# Supplementary material
Source: ML conference proceedings conference paper supplement (https://proceedings.neurips.cc/paper_files/paper/2017/hash/f60bb6bb4c96d4df93c51bd69dcc15a0-Abstract.html)
Supplement: Supplementary file [file f60bb6bb4c96d4df93c51bd69dcc15a0-Supplemental.zip]

---

# Supplementary Material to Alternating Estimation for Structured High-Dimensional Multi-Response Models

---

Sheng Chen      Arindam Banerjee  
Dept. of Computer Science & Engineering  
University of Minnesota, Twin Cities  
{shengc, banerjee}@cs.umn.edu

## 1 Preliminaries

In this section, we provide some background knowledge and lemmas, which is needed in our proofs. For the sake of convenience,  $C, C_0, c, c_0$  and so on are reserved for absolute constants.

### 1.1 Sub-Gaussian Random Variable/Vector

A random variable  $x$  is sub-Gaussian if the  $\psi_2$ -norm defined below is finite

$$\|x\|_{\psi_2} = \sup_{q \geq 1} \frac{\mathbb{E}|x|^q}{\sqrt{q}} < +\infty \quad (\text{S.1})$$

A random vector  $\mathbf{x} \in \mathbb{R}^p$  is sub-Gaussian if  $\langle \mathbf{x}, \mathbf{u} \rangle$  is sub-Gaussian for any  $\mathbf{u} \in \mathbb{R}^p$ , and  $\|\mathbf{x}\|_{\psi_2} = \sup_{\mathbf{u} \in \mathbb{R}^p} \|\langle \mathbf{x}, \mathbf{u} \rangle\|_{\psi_2}$ . A complete introduction can be found in [6]. Here we list some of the well-known properties of sub-Gaussian random variables/vectors, which are extracted from [6].

**Proposition A (Sub-Gaussian Tail)** *A random variable  $x$  satisfies the following inequality iff  $\|x\|_{\psi_2} \leq \kappa$ ,*

$$\mathbb{P}(|x| > \epsilon) \leq e \cdot \exp\left(-\frac{C\epsilon^2}{\kappa^2}\right), \quad (\text{S.2})$$

where  $C$  is an absolute constant.

**Proposition B** *If  $x_1, x_2, \dots, x_n$  are independent centered sub-Gaussian random variables, then  $\sum_i x_i$  is also a centered sub-Gaussian random variable with*

$$\left\| \sum_{i=1}^n x_i \right\|_{\psi_2}^2 \leq C^2 \sum_{i=1}^n \|x_i\|_{\psi_2}^2, \quad (\text{S.3})$$

where  $C$  is an absolute constant.

**Proposition C** *If  $x_1, x_2, \dots, x_n$  are independent centered sub-Gaussian random variables (not necessarily identical), then  $\mathbf{x} = [x_1, \dots, x_n]^T$  is a centered sub-Gaussian random vector with*

$$\|\mathbf{x}\|_{\psi_2} \leq C \max_{1 \leq i \leq n} \|x_i\|_{\psi_2}, \quad (\text{S.4})$$

where  $C$  is an absolute constant.

Essentially Proposition C can be shown using the definition of sub-Gaussian vector and Proposition B, which we generalize to independent sub-Gaussian vectors as follows.

**Lemma A** If  $\mathbf{x}_1, \mathbf{x}_2, \dots, \mathbf{x}_n$  are all  $m$ -dimensional independent centered sub-Gaussian random vectors, then  $\mathbf{x} = [\mathbf{x}_1^T, \dots, \mathbf{x}_n^T]^T \in \mathbb{R}^{mn}$  is also a centered sub-Gaussian random vector with

$$\|\mathbf{x}\|_{\psi_2} \leq C \max_{1 \leq i \leq n} \|\mathbf{x}_i\|_{\psi_2}, \quad (\text{S.5})$$

where  $C$  is an absolute constant.

*Proof:* Define  $\mathbf{a} = [\mathbf{a}_1^T, \mathbf{a}_2^T, \dots, \mathbf{a}_n^T]^T \in \mathbb{S}^{mn-1}$ , where each  $\mathbf{a}_i$  is  $m$ -dimensional. We have

$$\begin{aligned} \|\langle \mathbf{x}, \mathbf{a} \rangle\|_{\psi_2} &= \left\| \sum_{i=1}^n \langle \mathbf{x}_i, \mathbf{a}_i \rangle \right\|_{\psi_2} \leq \sqrt{C^2 \sum_{i=1}^n \|\langle \mathbf{x}_i, \mathbf{a}_i \rangle\|_{\psi_2}^2} \leq \sqrt{C^2 \sum_{i=1}^n \|\mathbf{a}_i\|_2^2 \|\mathbf{x}_i\|_{\psi_2}^2} \\ &\leq \sqrt{C^2 \sum_{i=1}^n \|\mathbf{a}_i\|_2^2} \cdot \max_{1 \leq i \leq n} \|\mathbf{x}_i\|_{\psi_2} = C \max_{1 \leq i \leq n} \|\mathbf{x}_i\|_{\psi_2}, \end{aligned}$$

where we use Proposition B for the first inequality. Based on the definition of sub-Gaussian random vector, we complete the proof.  $\blacksquare$

## 1.2 Generic Chaining and Gaussian Width

One important tool that we use in our probabilistic argument is *generic chaining* [4, 5], which is powerful for bounding the suprema of stochastic processes. Suppose  $\{Z_t\}_{t \in \mathcal{T}}$  is a centered stochastic process, where each  $Z_t$  is a centered random variable. We assume the index set  $\mathcal{T}$  is endowed with some metric (distance function)  $s(\cdot, \cdot)$ . A key notion in generic chaining is  $\gamma_2$ -functional  $\gamma_2(\mathcal{T}, s)$ , which is defined for the metric space  $(\mathcal{T}, s)$ . One can think of  $\gamma_2$ -functional as a measure of the size of set  $\mathcal{T}$  w.r.t. metric  $s$ . For self-containedness, we give the expression of  $\gamma_2(\mathcal{T}, s)$ .

$$\gamma_2(\mathcal{T}, s) = \inf_{\{\mathcal{P}_n\}} \sup_{t \in \mathcal{T}} \sum_{n \geq 0} 2^{n/2} \cdot \text{diam}(\mathcal{P}_n(t), s), \quad (\text{S.6})$$

where  $\{\mathcal{P}_n\}_{n=0}^\infty = \{\mathcal{P}_0, \mathcal{P}_1, \dots, \mathcal{P}_n, \dots\}$  is a sequence of partitions for  $\mathcal{T}$ , which satisfy that  $|\mathcal{P}_0| = 1$ ,  $|\mathcal{P}_n| \leq 2^{2^n}$  for  $n \geq 1$ , and that  $\mathcal{P}_{n+1}$  is a finer partition than  $\mathcal{P}_n$ , i.e., every  $\mathcal{Q} \in \mathcal{P}_{n+1}$  is a subset of some  $\mathcal{Q}' \in \mathcal{P}_n$ .  $\mathcal{P}_n(t)$  denotes the subset of  $\mathcal{T}$  that contains  $t$  in the  $n$ -th partition, and  $\text{diam}(\mathcal{P}_n(t), s)$  measures the diameter of  $\mathcal{P}_n(t)$  w.r.t. metric  $s(\cdot, \cdot)$ . Note that  $\gamma_2$ -functional is a purely geometric concept, which involves no probability. Given that  $\gamma_2$ -functional is fairly involved, we are not going to discuss any insights behind this definition, and refer interested readers to the introductory books [4, 5]. Based on its definition, we list a few straightforward properties of  $\gamma_2$ -functional here.

$$\gamma_2(\mathcal{T}, s_1) \leq \gamma_2(\mathcal{T}, s_2) \quad \text{if } s_1(\mathbf{u}, \mathbf{v}) \leq s_2(\mathbf{u}, \mathbf{v}), \forall \mathbf{u}, \mathbf{v} \in \mathcal{T} \quad (\text{S.7})$$

$$\gamma_2(\mathcal{T}, \beta s) = \beta \cdot \gamma_2(\mathcal{T}, s) \quad \text{for any } \beta > 0. \quad (\text{S.8})$$

$$\gamma_2(\mathcal{T}_1, s_1) = \gamma_2(\mathcal{T}_2, s_2) \quad \text{if } \exists \text{ a global isometry between } (\mathcal{T}_1, s_1) \text{ and } (\mathcal{T}_2, s_2) \quad (\text{S.9})$$

The following lemma concerned with the suprema of  $\{Z_t\}$  combines Theorem 2.2.22 and 2.2.27 from [5].

**Lemma B** Given metric space  $(\mathcal{T}, s)$ , if the associated centered stochastic process  $\{Z_t\}_{t \in \mathcal{T}}$  satisfies the condition

$$\mathbb{P}(|Z_{\mathbf{u}} - Z_{\mathbf{v}}| \geq \epsilon) \leq C_0 \exp\left(-\frac{C_1 \epsilon^2}{s^2(\mathbf{u}, \mathbf{v})}\right), \quad \forall \mathbf{u}, \mathbf{v} \in \mathcal{T}, \quad (\text{S.10})$$

then the following inequalities hold

$$\mathbb{E} \left[ \sup_{t \in \mathcal{T}} Z_t \right] \leq C_2 \gamma_2(\mathcal{T}, s), \quad (\text{S.11})$$

$$\mathbb{P} \left( \sup_{\mathbf{u}, \mathbf{v} \in \mathcal{T}} |Z_{\mathbf{u}} - Z_{\mathbf{v}}| \geq C_3 (\gamma_2(\mathcal{T}, s) + \epsilon \cdot \text{diam}(\mathcal{T}, s)) \right) \leq C_4 \exp(-\epsilon^2), \quad (\text{S.12})$$

where  $C_0, C_1, C_2, C_3$  and  $C_4$  are all absolute constants.

Another useful result based on generic chaining is the Theorem D in [2].

**Lemma C (Theorem D in [2])** *There exist absolute constants  $C_1, C_2$  for which the following holds. Let  $(\Omega, \mu)$  be a probability space on which  $X$  is defined, and  $X_1, \dots, X_n$  be independent copies of  $X$ . Let set  $\mathcal{H}$  be a subset of the unit sphere of  $L_2(\mu)$ , i.e.,  $\mathcal{H} \subseteq \mathbb{S}_{L_2} = \{h : \|h\|_{L_2} = \sqrt{\int_{\Omega} h^2(X) dX} = 1\}$ , and assume that  $\sup_{h \in \mathcal{H}} \|h\|_{\psi_2} \leq \kappa$ . Then, for any  $\beta > 0$  and  $n \geq 1$  satisfying*

$$C_1 \kappa \gamma_2(\mathcal{H}, \|\cdot\|_{\psi_2}) \leq \beta \sqrt{n}, \quad (\text{S.13})$$

*with probability at least  $1 - \exp(-C_2 \beta^2 n / \kappa^4)$ ,*

$$\sup_{h \in \mathcal{H}} \left| \frac{1}{n} \sum_{i=1}^n h^2(X_i) - \mathbb{E}[h^2] \right| \leq \beta. \quad (\text{S.14})$$

The suprema in both Lemma B and C are characterized in terms of  $\gamma_2$ -functional, which is not easily computable. In order to further bound the  $\gamma_2$ -functional, one needs the so-called *majorizing measures theorem* [3].

**Lemma D** *Given any Gaussian process  $\{Y_{\mathbf{t}}\}_{\mathbf{t} \in \mathcal{T}}$ , define  $s(\mathbf{u}, \mathbf{v}) = \sqrt{\mathbb{E}|Y_{\mathbf{u}} - Y_{\mathbf{v}}|^2}$  for  $\mathbf{u}, \mathbf{v} \in \mathcal{T}$ . Then  $\gamma_2(\mathcal{T}, s)$  can be upper bounded by*

$$\gamma_2(\mathcal{T}, s) \leq C_0 \mathbb{E} \left[ \sup_{\mathbf{t} \in \mathcal{T}} Y_{\mathbf{t}} \right], \quad (\text{S.15})$$

*where  $C_0$  is an absolute constant.*

We construct the simple Gaussian process  $\{Y_{\mathbf{t}} = \langle \mathbf{t}, \mathbf{g} \rangle\}_{\mathbf{t} \in \mathcal{T}}$  for any  $\mathcal{T} \subseteq \mathbb{R}^p$ , where  $\mathbf{g}$  is a standard Gaussian random vector. Hence  $s(\mathbf{u}, \mathbf{v}) = \sqrt{\mathbb{E}|Y_{\mathbf{u}} - Y_{\mathbf{v}}|^2} = \sqrt{\mathbb{E}|\langle \mathbf{u} - \mathbf{v}, \mathbf{g} \rangle|^2} = \|\mathbf{u} - \mathbf{v}\|_2$ . It follows from Lemma D that

$$\gamma_2(\mathcal{T}, \|\cdot\|_2) \leq C_0 \mathbb{E} \left[ \sup_{\mathbf{t} \in \mathcal{T}} \langle \mathbf{t}, \mathbf{g} \rangle \right] = C_0 \cdot w(\mathcal{T}), \quad (\text{S.16})$$

which makes the connection between  $\gamma_2$ -functional and Gaussian width. One technique we utilize in our proof for bounding Gaussian width is as follows, which originates in [1].

**Lemma E (Lemma 2 in [1])** *Let  $M > 4$ ,  $\mathcal{A}_1, \dots, \mathcal{A}_M \subset \mathbb{R}^p$ , and  $\mathcal{A} = \cup_m \mathcal{A}_m$ . The Gaussian width of  $\mathcal{A}$  satisfies*

$$w(\mathcal{A}) \leq \max_{1 \leq m \leq M} w(\mathcal{A}_m) + 2 \sup_{\mathbf{z} \in \mathcal{A}} \|\mathbf{z}\|_2 \sqrt{\log M} \quad (\text{S.17})$$

### 1.3 Proof of Lemma 1

**Statement of Lemma 1:** *Assume that  $\mathbf{X} \in \mathbb{R}^{m \times p}$  has dependent anisotropic rows such that  $\mathbf{X} = \Xi^{\frac{1}{2}} \tilde{\mathbf{X}} \Lambda^{\frac{1}{2}}$ , where  $\Xi \in \mathbb{R}^{m \times m}$  encodes the dependency between rows,  $\tilde{\mathbf{X}} \in \mathbb{R}^{m \times p}$  has independent isotropic rows, and  $\Lambda \in \mathbb{R}^{p \times p}$  introduces the anisotropy. In this setting, if each row of  $\tilde{\mathbf{X}}$  satisfies  $\|\tilde{\mathbf{x}}_i\|_{\psi_2} \leq \tilde{\kappa}$ , then condition (7) and (8) hold with  $\kappa = C\tilde{\kappa}$ ,  $\mu_{\min} = \lambda_{\min}(\Xi)\lambda_{\min}(\Lambda)$ , and  $\mu_{\max} = \lambda_{\max}(\Xi)\lambda_{\max}(\Lambda)$ .*

*Proof:* Let  $\mathbf{w} = \Xi^{\frac{1}{2}} \mathbf{u}$  for any  $\mathbf{u} \in \mathbb{S}^{m-1}$ , and we have

$$\begin{aligned} \Gamma_{\mathbf{u}} &= \mathbb{E} \left[ \Lambda^{\frac{1}{2}} \tilde{\mathbf{X}}^T \Xi^{\frac{1}{2}} \mathbf{u} \mathbf{u}^T \Xi^{\frac{1}{2}} \tilde{\mathbf{X}} \Lambda^{\frac{1}{2}} \right] \\ &= \mathbb{E} \left[ \left[ \Lambda^{\frac{1}{2}} \tilde{\mathbf{x}}_1, \dots, \Lambda^{\frac{1}{2}} \tilde{\mathbf{x}}_m \right] \cdot \begin{bmatrix} w_1 \\ \vdots \\ w_m \end{bmatrix} \cdot [w_1, \dots, w_m] \cdot \begin{bmatrix} \tilde{\mathbf{x}}_1^T \Lambda^{\frac{1}{2}} \\ \vdots \\ \tilde{\mathbf{x}}_m^T \Lambda^{\frac{1}{2}} \end{bmatrix} \right] \\ &= \sum_{i=1}^m \sum_{j=1}^m w_i w_j \mathbb{E} \left[ \Lambda^{\frac{1}{2}} \tilde{\mathbf{x}}_i \tilde{\mathbf{x}}_j^T \Lambda^{\frac{1}{2}} \right] = \sum_{i=1}^m w_i^2 \Lambda^{\frac{1}{2}} \mathbb{E} [\tilde{\mathbf{x}}_i \tilde{\mathbf{x}}_i^T] \Lambda^{\frac{1}{2}} = \left\| \Xi^{\frac{1}{2}} \mathbf{u} \right\|_2^2 \cdot \Lambda \end{aligned}$$

It is clear that

$$\lambda_{\min}(\Xi) \cdot \lambda_{\min}(\Lambda) \leq \lambda_{\min}(\Gamma_{\mathbf{u}}) \leq \lambda_{\max}(\Gamma_{\mathbf{u}}) \leq \lambda_{\max}(\Xi) \cdot \lambda_{\max}(\Lambda),$$

which indicates that condition (8) holds. If  $\|\tilde{\mathbf{x}}_i\|_{\psi_2} \leq \tilde{\kappa}$ , then

$$\begin{aligned} \|\mathbf{X}\|_{\psi_2} &= \sup_{\substack{\mathbf{v} \in \mathbb{S}^{p-1} \\ \mathbf{u} \in \mathbb{S}^{m-1}}} \left\| \mathbf{v}^T \Gamma_{\mathbf{u}}^{-\frac{1}{2}} \mathbf{X}^T \mathbf{u} \right\|_{\psi_2} = \sup_{\substack{\mathbf{v} \in \mathbb{S}^{p-1} \\ \mathbf{u} \in \mathbb{S}^{m-1}}} \left\| \frac{\mathbf{v}^T \Lambda^{-\frac{1}{2}}}{\|\Xi^{\frac{1}{2}} \mathbf{u}\|_2} \cdot \Lambda^{\frac{1}{2}} \tilde{\mathbf{X}}^T \Xi^{\frac{1}{2}} \mathbf{u} \right\|_{\psi_2} \\ &= \sup_{\substack{\mathbf{v} \in \mathbb{S}^{p-1} \\ \mathbf{u} \in \mathbb{S}^{m-1}}} \left\| \frac{\mathbf{v}^T \tilde{\mathbf{X}}^T}{\|\Xi^{\frac{1}{2}} \mathbf{u}\|_2} \cdot \Xi^{\frac{1}{2}} \mathbf{u} \right\|_{\psi_2} = \sup_{\mathbf{v} \in \mathbb{S}^{p-1}} \left\| \tilde{\mathbf{X}} \mathbf{v} \right\|_{\psi_2} \leq C \tilde{\kappa} \end{aligned}$$

where the inequality follows from noting that the vector  $\tilde{\mathbf{X}} \mathbf{v}$  has independent elements with  $\psi_2$ -norm bounded by  $\tilde{\kappa}$ , and thus  $\left\| \tilde{\mathbf{X}} \mathbf{v} \right\|_{\psi_2} \leq C \tilde{\kappa}$  for any  $\mathbf{v} \in \mathbb{S}^{p-1}$ . Therefore condition (7) also holds with  $\kappa = C \tilde{\kappa}$ .  $\blacksquare$

## 2 Proofs for Section 3.1

### 2.1 Proof of Lemma 2

**Statement of Lemma 2:** Suppose the RE condition (9) is satisfied by  $\mathbf{X}_1, \dots, \mathbf{X}_n$  and  $\Sigma$  with  $\alpha > 0$  for the set  $\mathcal{A}(\boldsymbol{\theta}^*) = \text{cone}\{\mathbf{v} \mid \|\boldsymbol{\theta}^* + \mathbf{v}\| \leq \|\boldsymbol{\theta}^*\|\} \cap \mathbb{S}^{p-1}$ . If  $\gamma_n$  is admissible, then  $\hat{\boldsymbol{\theta}}$  in (11) satisfies

$$\left\| \hat{\boldsymbol{\theta}} - \boldsymbol{\theta}^* \right\|_2 \leq 2\Psi(\boldsymbol{\theta}^*) \cdot \frac{\gamma_n}{\alpha}, \quad (\text{S.18})$$

in which  $\Psi(\boldsymbol{\theta}^*)$  is the restricted norm compatibility defined as  $\Psi(\boldsymbol{\theta}^*) = \sup_{\mathbf{v} \in \mathcal{A}(\boldsymbol{\theta}^*)} \frac{\|\mathbf{v}\|}{\|\mathbf{v}\|_2}$ .

*Proof:* Since  $\hat{\boldsymbol{\theta}}$  is feasible and  $\gamma_n$  is selected to be admissible, we have

$$\begin{aligned} \left\| \frac{1}{n} \sum_{i=1}^n \mathbf{X}_i^T \Sigma^{-1} (\mathbf{X}_i \hat{\boldsymbol{\theta}} - \mathbf{y}_i) \right\|_* &\leq \gamma_n, \quad \left\| \frac{1}{n} \sum_{i=1}^n \mathbf{X}_i^T \Sigma^{-1} (\mathbf{X}_i \boldsymbol{\theta}^* - \mathbf{y}_i) \right\|_* \leq \gamma_n \\ \implies \left\| \frac{1}{n} \sum_{i=1}^n \mathbf{X}_i^T \Sigma^{-1} \mathbf{X}_i (\hat{\boldsymbol{\theta}} - \boldsymbol{\theta}^*) \right\|_* &\leq 2\gamma_n \\ \implies \left\langle \hat{\boldsymbol{\theta}} - \boldsymbol{\theta}^*, \frac{1}{n} \sum_{i=1}^n \mathbf{X}_i^T \Sigma^{-1} \mathbf{X}_i (\hat{\boldsymbol{\theta}} - \boldsymbol{\theta}^*) \right\rangle &\leq \|\hat{\boldsymbol{\theta}} - \boldsymbol{\theta}^*\| \cdot \left\| \frac{1}{n} \sum_{i=1}^n \mathbf{X}_i^T \Sigma^{-1} \mathbf{X}_i (\hat{\boldsymbol{\theta}} - \boldsymbol{\theta}^*) \right\|_* \\ \implies (\hat{\boldsymbol{\theta}} - \boldsymbol{\theta}^*)^T \left( \frac{1}{n} \sum_{i=1}^n \mathbf{X}_i^T \Sigma^{-1} \mathbf{X}_i \right) (\hat{\boldsymbol{\theta}} - \boldsymbol{\theta}^*) &\leq 2\gamma_n \|\hat{\boldsymbol{\theta}} - \boldsymbol{\theta}^*\| \end{aligned}$$

As  $\|\hat{\boldsymbol{\theta}}\| \leq \|\boldsymbol{\theta}^*\|$ , we have  $\frac{\hat{\boldsymbol{\theta}} - \boldsymbol{\theta}^*}{\|\hat{\boldsymbol{\theta}} - \boldsymbol{\theta}^*\|_2} \in \mathcal{A}(\boldsymbol{\theta}^*)$ . By the assumption of RE condition, we further obtain

$$\begin{aligned} \alpha \|\hat{\boldsymbol{\theta}} - \boldsymbol{\theta}^*\|_2^2 &\leq (\hat{\boldsymbol{\theta}} - \boldsymbol{\theta}^*)^T \left( \frac{1}{n} \sum_{i=1}^n \mathbf{X}_i^T \Sigma^{-1} \mathbf{X}_i \right) (\hat{\boldsymbol{\theta}} - \boldsymbol{\theta}^*) \leq 2\gamma_n \|\hat{\boldsymbol{\theta}} - \boldsymbol{\theta}^*\| \\ \implies \|\hat{\boldsymbol{\theta}} - \boldsymbol{\theta}^*\|_2 &\leq \frac{\|\hat{\boldsymbol{\theta}} - \boldsymbol{\theta}^*\|}{\|\hat{\boldsymbol{\theta}} - \boldsymbol{\theta}^*\|_2} \cdot \frac{2\gamma_n}{\alpha} \leq 2\Psi(\boldsymbol{\theta}^*) \cdot \frac{\gamma_n}{\alpha}, \end{aligned}$$

where we use the definition of restricted norm compatibility.  $\blacksquare$

## 2.2 Proof of Lemma 3

**Statement of Lemma 3:** Given sub-Gaussian  $\mathbf{X} \in \mathbb{R}^{m \times p}$  with its i.i.d. copies  $\mathbf{X}_1, \dots, \mathbf{X}_n$ , and covariance  $\Sigma \in \mathbb{R}^{m \times m}$  with eigenvectors  $\mathbf{u}_1, \dots, \mathbf{u}_m$ , let  $\Gamma = \mathbb{E}[\mathbf{X}^T \Sigma^{-1} \mathbf{X}]$  and  $\hat{\Gamma} = \frac{1}{n} \sum_{i=1}^n \mathbf{X}_i^T \Sigma^{-1} \mathbf{X}_i$ . Define the set  $\mathcal{A}_{\Gamma_j}$  for  $\mathcal{A} \subseteq \mathbb{S}^{p-1}$  and each  $\Gamma_j = \mathbb{E}[\mathbf{X}^T \mathbf{u}_j \mathbf{u}_j^T \mathbf{X}]$  as  $\mathcal{A}_{\Gamma_j} = \left\{ \mathbf{v} \in \mathbb{S}^{p-1} \mid \Gamma_j^{-\frac{1}{2}} \mathbf{v} \in \text{cone}(\mathcal{A}) \right\}$ . If  $n \geq C_1 \kappa^4 \cdot \max_j \{w^2(\mathcal{A}_{\Gamma_j})\}$ , with probability at least  $1 - m \exp(-C_2 n / \kappa^4)$ , we have

$$\mathbf{v}^T \hat{\Gamma} \mathbf{v} \geq \frac{1}{2} \mathbf{v}^T \Gamma \mathbf{v}, \quad \forall \mathbf{v} \in \mathcal{A}. \quad (\text{S.19})$$

*Proof:* Assume that the eigenvalue decomposition of  $\Sigma$  is given by  $\Sigma = \sum_{i=1}^m \sigma_i \mathbf{u}_i \mathbf{u}_i^T$ . For convenience, we denote  $\mathbf{z}^j = \mathbf{X}^T \mathbf{u}_j$ ,  $\mathbf{z}_i^j = \mathbf{X}_i^T \mathbf{u}_j$ , and  $\hat{\Gamma}_j = \frac{1}{n} \sum_{i=1}^n \mathbf{X}_i^T \mathbf{u}_j \mathbf{u}_j^T \mathbf{X}_i$ . Note that  $\Gamma_j = \mathbb{E}[\mathbf{z}^j \mathbf{z}^{jT}]$ ,  $\Gamma = \sum_{j=1}^m \frac{\Gamma_j}{\sigma_j}$ ,  $\hat{\Gamma}_j = \frac{1}{n} \sum_{i=1}^n \mathbf{z}_i^j \mathbf{z}_i^{jT}$ , and  $\hat{\Gamma} = \sum_{j=1}^m \frac{\hat{\Gamma}_j}{\sigma_j}$ . In order to apply Lemma C, we let  $(\Omega_j, \mu_j)$  be the probability measure that  $\mathbf{z}^j$  is defined on, and construct the function set

$$\mathcal{H}_j = \left\{ h_{\mathbf{v}} = \left\langle \Gamma_j^{-\frac{1}{2}} \mathbf{v}, \cdot \right\rangle \mid \mathbf{v} \in \mathcal{A}_{\Gamma_j} \right\}$$

It is easy to see that for any  $h_{\mathbf{v}} \in \mathcal{H}_j$ ,

$$\mathbb{E}[h_{\mathbf{v}}^2] = \mathbb{E}_{\mathbf{z}^j \sim \mu_j} \left[ \mathbf{v}^T \Gamma_j^{-\frac{1}{2}} \mathbf{z}^j \mathbf{z}^{jT} \Gamma_j^{-\frac{1}{2}} \mathbf{v} \right] = \mathbf{v}^T \Gamma_j^{-\frac{1}{2}} \left( \mathbb{E}_{\mathbf{z}^j \sim \mu_j} [\mathbf{z}^j \mathbf{z}^{jT}] \right) \Gamma_j^{-\frac{1}{2}} \mathbf{v} = \mathbf{v}^T \mathbf{v} = 1,$$

i.e.,  $\mathcal{H}_j \subseteq \mathbb{S}_{L_2(\mu_j)} = \{h \mid \|h\|_{L_2(\mu_j)} = 1\}$ . Based on the definition of sub-Gaussian  $\mathbf{X}$ , we also have for any  $\mathbf{v} \in \mathcal{A}_{\Gamma_j}$ ,

$$\|h_{\mathbf{v}}\|_{\psi_2} = \left\| \left\langle \Gamma_j^{-\frac{1}{2}} \mathbf{v}, \mathbf{z}^j \right\rangle \right\|_{\psi_2} = \left\| \mathbf{v}^T \Gamma_j^{-\frac{1}{2}} \mathbf{X}^T \mathbf{u}_j \right\|_{\psi_2} \leq \kappa,$$

and also for any  $\mathbf{v}_1, \mathbf{v}_2 \in \mathcal{A}_{\Gamma_j}$ , we have

$$\|h_{\mathbf{v}_1} - h_{\mathbf{v}_2}\|_{\psi_2} = \left\| (\mathbf{v}_1 - \mathbf{v}_2)^T \Gamma_j^{-\frac{1}{2}} \mathbf{z}^j \right\|_{\psi_2} \leq \kappa \cdot \|\mathbf{v}_1 - \mathbf{v}_2\|_2.$$

If we choose  $\beta = \frac{1}{2}$ , using (S.7), (S.8) and (S.9), then we have

$$c_1 \kappa \cdot \gamma_2(\mathcal{H}_j, \|\cdot\|_{\psi_2}) \leq c_1 \kappa^2 \cdot \gamma_2(\mathcal{A}_{\Gamma_j}, \|\cdot\|_2) \leq c_1 c_4 \kappa^2 \cdot w(\mathcal{A}_{\Gamma_j}) \leq \beta \sqrt{n}$$

when  $n \geq C_1 \kappa^4 w^2(\mathcal{A}_{\Gamma_j})$  where  $C_1 = 4c_1^2 c_4^2$ . By Lemma C, with probability at least  $1 - \exp(-c_2 \beta^2 n / \kappa^4) = 1 - \exp(-C_2 n / \kappa^4)$  where  $C_2 = c_2 / 4$ , we have

$$\begin{aligned} \sup_{h \in \mathcal{H}_j} \left| \frac{1}{n} \sum_{i=1}^n h^2(\mathbf{z}_i^j) - \mathbb{E}[h^2] \right| &= \sup_{\mathbf{v} \in \mathcal{A}_{\Gamma_j}} \left| \frac{1}{n} \sum_{i=1}^n \mathbf{v}^T \Gamma_j^{-\frac{1}{2}} \mathbf{z}_i^j \mathbf{z}_i^{jT} \Gamma_j^{-\frac{1}{2}} \mathbf{v} - 1 \right| \\ &= \sup_{\mathbf{v} \in \mathcal{A}_{\Gamma_j}} \left| \mathbf{v}^T \Gamma_j^{-\frac{1}{2}} \hat{\Gamma}_j \Gamma_j^{-\frac{1}{2}} \mathbf{v} - 1 \right| \leq \frac{1}{2} \\ \implies \mathbf{v}^T \Gamma_j^{-\frac{1}{2}} \hat{\Gamma}_j \Gamma_j^{-\frac{1}{2}} \mathbf{v} &\geq \frac{1}{2}, \quad \forall \mathbf{v} \in \mathcal{A}_{\Gamma_j} \\ \implies \mathbf{v}^T \Gamma_j^{-\frac{1}{2}} \hat{\Gamma}_j \Gamma_j^{-\frac{1}{2}} \mathbf{v} &\geq \frac{1}{2} \left( \mathbf{v}^T \Gamma_j^{-\frac{1}{2}} \Gamma_j \Gamma_j^{-\frac{1}{2}} \mathbf{v} \right), \quad \forall \mathbf{v} \in \mathcal{A}_{\Gamma_j} \end{aligned}$$

Let  $\mathbf{w} = \Gamma_j^{-\frac{1}{2}} \mathbf{v}$ , and note that the inequalities above are preserved under arbitrary scaling of  $\mathbf{w}$ . By recalling the definition of  $\mathcal{A}_{\Gamma_j}$ , it is not difficult to see that

$$\mathbf{w}^T \hat{\Gamma}_j \mathbf{w} \geq \frac{1}{2} \mathbf{w}^T \Gamma_j \mathbf{w}, \quad \forall \mathbf{w} \in \mathcal{A}. \quad (\text{S.20})$$

Combining (S.20) for each  $\Gamma_j$  using union bound, we obtain

$$\mathbf{w}^T \left( \sum_{i=1}^m \frac{\hat{\Gamma}_j}{\sigma_j} \right) \mathbf{w} \geq \frac{1}{2} \mathbf{w}^T \left( \sum_{i=1}^m \frac{\Gamma_j}{\sigma_j} \right) \mathbf{w}, \quad \forall \mathbf{w} \in \mathcal{A} \implies \mathbf{w}^T \hat{\Gamma} \mathbf{w} \geq \frac{1}{2} \mathbf{w}^T \Gamma \mathbf{w}, \quad \forall \mathbf{w} \in \mathcal{A},$$

which completes the proof by renaming  $\mathbf{w}$  as  $\mathbf{v}$ .  $\blacksquare$

### 2.3 Proof of Lemma 4

**Statement of Lemma 4:** Let  $\kappa_0$  be the  $\psi_2$ -norm of standard Gaussian random vector and  $\mathbf{\Gamma}_{\mathbf{u}} = \mathbb{E}[\mathbf{X}^T \mathbf{u} \mathbf{u}^T \mathbf{X}]$ , where  $\mathbf{u} \in \mathbb{S}^{m-1}$  is fixed. For  $\mathcal{A}_{\mathbf{\Gamma}_{\mathbf{u}}}$  defined in Lemma 3, we have

$$w(\mathcal{A}_{\mathbf{\Gamma}_{\mathbf{u}}}) \leq C \kappa_0 \sqrt{\mu_{\max}/\mu_{\min}} \cdot (w(\mathcal{A}) + 3), \quad (\text{S.21})$$

*Proof:* Recall the definition of Gaussian width  $w(\mathcal{A}_{\mathbf{\Gamma}_{\mathbf{u}}}) = \mathbb{E} \left[ \sup_{\mathbf{v} \in \mathcal{A}_{\mathbf{\Gamma}_{\mathbf{u}}}} \langle \mathbf{v}, \mathbf{g} \rangle \right]$ , where  $\mathbf{g}$  is a standard Gaussian random vector. Given the assumption (8), we have  $\mu_{\min} \leq \lambda_{\min}(\mathbf{\Gamma}_{\mathbf{u}}) \leq \lambda_{\max}(\mathbf{\Gamma}_{\mathbf{u}}) \leq \mu_{\max}$ , and note that

$$\begin{aligned} \sup_{\mathbf{v} \in \mathcal{A}_{\mathbf{\Gamma}_{\mathbf{u}}}} \langle \mathbf{v}, \mathbf{g} \rangle &= \sup_{\mathbf{v} \in \mathcal{A}_{\mathbf{\Gamma}_{\mathbf{u}}}} \left\langle \mathbf{\Gamma}_{\mathbf{u}}^{-\frac{1}{2}} \mathbf{v}, \mathbf{\Gamma}_{\mathbf{u}}^{\frac{1}{2}} \mathbf{g} \right\rangle \leq \sup_{\mathbf{v} \in \text{cone}(\mathcal{A}) \cap \frac{1}{\sqrt{\mu_{\min}}} \mathbb{B}^p} \left\langle \mathbf{v}, \mathbf{\Gamma}_{\mathbf{u}}^{\frac{1}{2}} \mathbf{g} \right\rangle \\ &= \frac{1}{\sqrt{\mu_{\min}}} \cdot \sup_{\mathbf{v} \in \text{cone}(\mathcal{A}) \cap \mathbb{B}^p} \left\langle \mathbf{v}, \mathbf{\Gamma}_{\mathbf{u}}^{\frac{1}{2}} \mathbf{g} \right\rangle, \end{aligned} \quad (\text{S.22})$$

where the inequality follows from  $\mathbf{\Gamma}_{\mathbf{u}}^{-\frac{1}{2}} \mathbf{v} \in \text{cone}(\mathcal{A})$  and  $\|\mathbf{\Gamma}_{\mathbf{u}}^{-\frac{1}{2}} \mathbf{v}\|_2 \leq \frac{1}{\sqrt{\mu_{\min}}}$ . Now we use generic chaining to bound the right-hand side above. Denote the set  $\text{cone}(\mathcal{A}) \cap \mathbb{B}^p$  by  $\mathcal{T}$ , and we consider the stochastic process  $\{Z_{\mathbf{v}} = \langle \mathbf{v}, \mathbf{\Gamma}_{\mathbf{u}}^{\frac{1}{2}} \mathbf{g} \rangle\}_{\mathbf{v} \in \mathcal{T}}$ . For any  $\mathbf{v}_1, \mathbf{v}_2 \in \mathcal{T}$ , we have

$$\|Z_{\mathbf{v}_1} - Z_{\mathbf{v}_2}\|_{\psi_2} = \left\| \left\langle \mathbf{\Gamma}_{\mathbf{u}}^{\frac{1}{2}} (\mathbf{v}_1 - \mathbf{v}_2), \mathbf{g} \right\rangle \right\|_{\psi_2} \leq \kappa_0 \left\| \mathbf{\Gamma}_{\mathbf{u}}^{\frac{1}{2}} (\mathbf{v}_1 - \mathbf{v}_2) \right\|_2 \leq \kappa_0 \sqrt{\mu_{\max}} \cdot \|\mathbf{v}_1 - \mathbf{v}_2\|_2.$$

If we define for  $\mathcal{T}$  the metric  $s(\mathbf{v}_1, \mathbf{v}_2) = \kappa_0 \sqrt{\mu_{\max}} \cdot \|\mathbf{v}_1 - \mathbf{v}_2\|_2$ , it follows from Proposition A that

$$\mathbb{P}(|Z_{\mathbf{v}_1} - Z_{\mathbf{v}_2}| \geq \epsilon) \leq e \cdot \exp \left( -\frac{c\epsilon^2}{\kappa_0^2 \mu_{\max} \|\mathbf{v}_1 - \mathbf{v}_2\|_2^2} \right) = e \cdot \exp \left( -\frac{c\epsilon^2}{s^2(\mathbf{v}_1, \mathbf{v}_2)} \right).$$

By Lemma B, (S.8) and (S.16), we obtain

$$\mathbb{E} \left[ \sup_{\mathbf{v} \in \mathcal{T}} \langle \mathbf{v}, \mathbf{\Gamma}_{\mathbf{u}}^{\frac{1}{2}} \mathbf{g} \rangle \right] = \mathbb{E} \left[ \sup_{\mathbf{v} \in \mathcal{T}} Z_{\mathbf{v}} \right] \leq c_1 \gamma_2(\mathcal{T}, s) = c_1 \kappa_0 \sqrt{\mu_{\max}} \gamma_2(\mathcal{T}, \|\cdot\|_2) \leq c_1 c_2 \kappa_0 \sqrt{\mu_{\max}} \cdot w(\mathcal{T}) \quad (\text{S.23})$$

Note that  $\mathcal{T} = \text{cone}(\mathcal{A}) \cap \mathbb{B}^p \subseteq \text{conv}(\mathcal{A} \cup \{\mathbf{0}\})$ . By Lemma E, we have

$$w(\mathcal{T}) \leq w(\text{conv}(\mathcal{A} \cup \{\mathbf{0}\})) = w(\mathcal{A} \cup \{\mathbf{0}\}) \leq \max\{w(\mathcal{A}), w(\mathbf{0})\} + 2\sqrt{\ln 4} \leq w(\mathcal{A}) + 3. \quad (\text{S.24})$$

Combining (S.22), (S.23) and (S.24), we have

$$w(\mathcal{A}_{\mathbf{\Gamma}_{\mathbf{u}}}) = \mathbb{E} \left[ \sup_{\mathbf{v} \in \mathcal{A}_{\mathbf{\Gamma}_{\mathbf{u}}}} \langle \mathbf{v}, \mathbf{g} \rangle \right] \leq \frac{1}{\sqrt{\mu_{\min}}} \mathbb{E} \left[ \sup_{\mathbf{v} \in \mathcal{T}} \left\langle \mathbf{v}, \mathbf{\Gamma}_{\mathbf{u}}^{\frac{1}{2}} \mathbf{g} \right\rangle \right] \leq c_1 c_2 \kappa_0 \sqrt{\frac{\mu_{\max}}{\mu_{\min}}} \cdot (w(\mathcal{A}) + 3), \quad (\text{S.25})$$

where the last inequality follows from condition (8).  $\blacksquare$

### 2.4 Proof of Corollary 1

**Statement of Corollary 1:** Under the notations of Lemma 3 and 4, if  $n \geq C_1 \kappa_0^2 \kappa^4 \cdot \frac{\mu_{\max}}{\mu_{\min}} \cdot (w(\mathcal{A}) + 3)^2$ , then the following inequality holds for all  $\mathbf{v} \in \mathcal{A} \subseteq \mathbb{S}^{p-1}$  with probability at least  $1 - m \exp(-C_2 n / \kappa^4)$ ,

$$\mathbf{v}^T \hat{\mathbf{\Gamma}} \mathbf{v} \geq \frac{\mu_{\min}}{2} \cdot \text{Tr}(\mathbf{\Sigma}^{-1}) \quad (\text{S.26})$$

*Proof:* Given the definition of sub-Gaussian  $\mathbf{X}$  and Lemma 3, we have

$$\begin{aligned} \mathbf{v}^T \hat{\mathbf{\Gamma}} \mathbf{v} &\geq \frac{1}{2} \mathbf{v}^T \mathbf{\Gamma} \mathbf{v} = \frac{1}{2} \mathbf{v}^T \left( \sum_{j=1}^m \frac{1}{\sigma_j} \cdot \mathbb{E}[\mathbf{X}^T \mathbf{u}_j \mathbf{u}_j^T \mathbf{X}] \right) \mathbf{v} \\ &\geq \frac{\mu_{\min}}{2} \cdot \mathbf{v}^T \mathbf{v} \left( \sum_{j=1}^m \frac{1}{\sigma_j} \right) = \frac{\mu_{\min}}{2} \text{Tr}(\mathbf{\Sigma}^{-1}). \end{aligned}$$

Using the bound in Lemma 4, we have

$$n \geq C_1 \kappa_0^2 \kappa^4 \cdot \frac{\mu_{\max}}{\mu_{\min}} \cdot (w(\mathcal{A}) + 3)^2 \implies n \geq C \kappa^4 \cdot \max_j \{w^2(\mathcal{A}_{\mathbf{r}_j})\}$$

We complete the proof by combining the two equations above.  $\blacksquare$

## 2.5 Proof of Lemma 5

**Statement of Lemma 5:** Assume that  $\mathbf{X}_i$  is sub-Gaussian and  $\boldsymbol{\eta}_i \sim \mathcal{N}(\mathbf{0}, \boldsymbol{\Sigma}_*)$ . The following inequality holds with probability at least  $1 - \exp\left(-\frac{n\tau^2}{2}\right) - C_2 \exp\left(-\frac{C_1^2 w^2(\mathcal{B})}{4\rho^2}\right)$

$$\left\| \frac{1}{n} \sum_{i=1}^n \mathbf{X}_i^T \boldsymbol{\Sigma}^{-1} \boldsymbol{\eta}_i \right\|_* \leq \frac{C \kappa \sqrt{\mu_{\max}}}{\sqrt{n}} \cdot \sqrt{\text{Tr}(\boldsymbol{\Sigma}^{-1} \boldsymbol{\Sigma}_* \boldsymbol{\Sigma}^{-1})} \cdot w(\mathcal{B}), \quad (\text{S.27})$$

where  $\mathcal{B}$  denotes the unit ball of norm  $\|\cdot\|$ ,  $\rho = \sup_{\mathbf{v} \in \mathcal{B}} \|\mathbf{v}\|_2$ , and  $\tau = \|\boldsymbol{\Sigma}^{-1} \boldsymbol{\Sigma}_*^{\frac{1}{2}}\|_F / \|\boldsymbol{\Sigma}^{-1} \boldsymbol{\Sigma}_*^{\frac{1}{2}}\|_2$ .

*Proof:* Since design  $\mathbf{X}_i$  and noise  $\boldsymbol{\eta}_i$  are independent, we first consider the scenario where each  $\boldsymbol{\eta}_i$  is arbitrary but fixed vector. Using the definition of dual norm, we have

$$\left\| \frac{1}{n} \sum_{i=1}^n \mathbf{X}_i^T \boldsymbol{\Sigma}^{-1} \boldsymbol{\eta}_i \right\|_* = \frac{1}{n} \cdot \sup_{\mathbf{v} \in \mathcal{B}} \left\langle \mathbf{v}, \sum_{i=1}^n \mathbf{X}_i^T \boldsymbol{\Sigma}^{-1} \boldsymbol{\eta}_i \right\rangle = \frac{1}{n} \cdot \sup_{\mathbf{v} \in \mathcal{B}} \sum_{i=1}^n \left\langle \boldsymbol{\Lambda}_i^{\frac{1}{2}} \mathbf{v}, \boldsymbol{\Lambda}_i^{-\frac{1}{2}} \mathbf{X}_i^T \boldsymbol{\Sigma}^{-1} \boldsymbol{\eta}_i \right\rangle$$

where  $\boldsymbol{\Lambda}_i = \mathbb{E}_{\mathbf{X}_i}[\mathbf{X}_i^T \boldsymbol{\Sigma}^{-1} \boldsymbol{\eta}_i \boldsymbol{\eta}_i^T \boldsymbol{\Sigma}^{-1} \mathbf{X}_i]$ . Based on the definition of sub-Gaussian  $\mathbf{X}_i$ , we get

$$\begin{aligned} \left\| \boldsymbol{\Lambda}_i^{-\frac{1}{2}} \mathbf{X}_i^T \boldsymbol{\Sigma}^{-1} \boldsymbol{\eta}_i \right\|_{\psi_2} &\leq \kappa \implies \\ \left\| \sum_{i=1}^n \left\langle \boldsymbol{\Lambda}_i^{\frac{1}{2}} \mathbf{v}, \boldsymbol{\Lambda}_i^{-\frac{1}{2}} \mathbf{X}_i^T \boldsymbol{\Sigma}^{-1} \boldsymbol{\eta}_i \right\rangle \right\|_{\psi_2} &\leq c_0 \max_{1 \leq i \leq n} \left\| \boldsymbol{\Lambda}_i^{-\frac{1}{2}} \mathbf{X}_i^T \boldsymbol{\Sigma}^{-1} \boldsymbol{\eta}_i \right\|_{\psi_2} \cdot \sqrt{\sum_{i=1}^n \left\| \boldsymbol{\Lambda}_i^{\frac{1}{2}} \mathbf{v} \right\|_2^2} \\ &\leq c_0 \kappa \sqrt{\sum_{i=1}^n \left\| \boldsymbol{\Lambda}_i^{\frac{1}{2}} \right\|_2^2 \|\mathbf{v}\|_2^2} \leq c_0 \kappa \sqrt{\mu_{\max}} \cdot \sqrt{\sum_{i=1}^n \|\boldsymbol{\Sigma}^{-1} \boldsymbol{\eta}_i\|_2^2} \cdot \|\mathbf{v}\|_2 \end{aligned}$$

where we use Lemma A in the first inequality by treating the sum of inner products as one “big” inner product. The last inequality follows from the definition of  $\mu_{\max}$  in (8). Now we consider the stochastic process  $\{Z_{\mathbf{v}} = \langle \mathbf{v}, \sum_{i=1}^n \mathbf{X}_i^T \boldsymbol{\Sigma}^{-1} \boldsymbol{\eta}_i \rangle\}_{\mathbf{v} \in \mathcal{B}}$ , where  $\boldsymbol{\eta}_i$  is still fixed. For any  $Z_{\mathbf{v}_1}$  and  $Z_{\mathbf{v}_2}$ , by the argument above and Proposition A, we have

$$\begin{aligned} \|Z_{\mathbf{v}_1} - Z_{\mathbf{v}_2}\|_{\psi_2} &\leq c_0 \kappa \sqrt{\mu_{\max}} \cdot \sqrt{\sum_{i=1}^n \|\boldsymbol{\Sigma}^{-1} \boldsymbol{\eta}_i\|_2^2} \cdot \|\mathbf{v}_1 - \mathbf{v}_2\|_2 \triangleq s(\mathbf{v}_1, \mathbf{v}_2) \\ \implies \mathbb{P}(|Z_{\mathbf{v}_1} - Z_{\mathbf{v}_2}| > \epsilon) &\leq e \cdot \exp\left(-\frac{C_1 \epsilon^2}{s^2(\mathbf{v}_1, \mathbf{v}_2)}\right) \end{aligned}$$

It follows from (S.8), (S.16) and Lemma B that

$$\begin{aligned} \gamma_2(\mathcal{B}, s) &= c_0 \kappa \sqrt{\mu_{\max}} \cdot \sqrt{\sum_{i=1}^n \|\boldsymbol{\Sigma}^{-1} \boldsymbol{\eta}_i\|_2^2} \cdot \gamma_2(\mathcal{B}, \|\cdot\|_2) \leq c_0 c_1 \kappa \sqrt{\mu_{\max}} \cdot \sqrt{\sum_{i=1}^n \|\boldsymbol{\Sigma}^{-1} \boldsymbol{\eta}_i\|_2^2} \cdot w(\mathcal{B}), \\ \mathbb{P}_{\mathbf{X}_i} \left( \sup_{\mathbf{v}_1, \mathbf{v}_2 \in \mathcal{B}} |Z_{\mathbf{v}_1} - Z_{\mathbf{v}_2}| \geq c_2 (\gamma_2(\mathcal{B}, s) + \epsilon \cdot \text{diam}(\mathcal{B}, s)) \right) &\leq c_3 \exp(-\epsilon^2) \end{aligned}$$

Combining the two inequalities above with the symmetry of  $\mathcal{B}$ , we obtain

$$\mathbb{P}_{\mathbf{X}} \left( \sup_{\mathbf{v} \in \mathcal{B}} Z_{\mathbf{v}} \geq c_0 c_2 \kappa \sqrt{\mu_{\max}} \cdot \sqrt{\sum_{i=1}^n \|\boldsymbol{\Sigma}^{-1} \boldsymbol{\eta}_i\|_2^2} \left( \frac{c_1}{2} \cdot w(\mathcal{B}) + \epsilon \cdot \sup_{\mathbf{v} \in \mathcal{B}} \|\mathbf{v}\|_2 \right) \right) \leq c_3 \exp(-\epsilon^2)$$

Letting  $\rho = \sup_{\mathbf{v} \in \mathcal{B}} \|\mathbf{v}\|_2$ ,  $\epsilon = \frac{c_1 w(\mathcal{B})}{2\rho}$ , with probability at least  $1 - c_3 \exp(-\frac{c_1^2 w^2(\mathcal{B})}{4\rho^2})$ , we have

$$\sup_{\mathbf{v} \in \mathcal{B}} Z_{\mathbf{v}} = \left\| \sum_{i=1}^n \mathbf{X}_i^T \Sigma^{-1} \boldsymbol{\eta}_i \right\|_* \leq c_0 c_1 c_2 \kappa \sqrt{\mu_{\max}} \cdot \sqrt{\sum_{i=1}^n \|\Sigma^{-1} \boldsymbol{\eta}_i\|_2^2 \cdot w(\mathcal{B})} \quad (\text{S.28})$$

for any given set of  $\boldsymbol{\eta}_i$ . Now we incorporate the randomness of  $\boldsymbol{\eta}_i$ . Essentially we need to bound

$$\sqrt{\sum_{i=1}^n \|\Sigma^{-1} \boldsymbol{\eta}_i\|_2^2} = \sqrt{\sum_{i=1}^n \|\Sigma^{-1} \Sigma_*^{\frac{1}{2}} \tilde{\boldsymbol{\eta}}_i\|_2^2},$$

where each  $\tilde{\boldsymbol{\eta}}_i$  is an  $m$ -dimensional standard (isotropic) Gaussian random vector. Given  $\mathbf{v} = [\mathbf{v}_1^T, \dots, \mathbf{v}_n^T]^T \in \mathbb{R}^{mn}$ , Denote  $f(\mathbf{v}) = \sqrt{\sum_{i=1}^n \|\Sigma^{-1} \Sigma_*^{\frac{1}{2}} \mathbf{v}_i\|_2^2}$ , and we have

$$\begin{aligned} |f(\mathbf{v}) - f(\mathbf{w})| &= \left| \sqrt{\sum_{i=1}^n \|\Sigma^{-1} \Sigma_*^{\frac{1}{2}} \mathbf{v}_i\|_2^2} - \sqrt{\sum_{i=1}^n \|\Sigma^{-1} \Sigma_*^{\frac{1}{2}} \mathbf{w}_i\|_2^2} \right| \\ &\leq \sqrt{\sum_{i=1}^n \left( \|\Sigma^{-1} \Sigma_*^{\frac{1}{2}} \mathbf{v}_i\|_2 - \|\Sigma^{-1} \Sigma_*^{\frac{1}{2}} \mathbf{w}_i\|_2 \right)^2} \\ &\leq \sqrt{\sum_{i=1}^n \|\Sigma^{-1} \Sigma_*^{\frac{1}{2}} (\mathbf{v}_i - \mathbf{w}_i)\|_2^2} \\ &\leq \sqrt{\sum_{i=1}^n \|\Sigma^{-1} \Sigma_*^{\frac{1}{2}}\|_2^2 \|\mathbf{v}_i - \mathbf{w}_i\|_2^2} = \|\Sigma^{-1} \Sigma_*^{\frac{1}{2}}\|_2 \|\mathbf{v} - \mathbf{w}\|_2 \end{aligned}$$

which implies that  $f$  is a Lipschitz function with parameter  $\|\Sigma^{-1} \Sigma_*^{\frac{1}{2}}\|_2$ . The first two inequalities use the triangular inequality for  $L_2$  norm. Letting  $\tilde{\boldsymbol{\eta}} = [\tilde{\boldsymbol{\eta}}_1^T, \dots, \tilde{\boldsymbol{\eta}}_n^T]^T$ , by the concentration inequality for Lipschitz function of Gaussian random vector (see Proposition 5.34 in [6]), we obtain

$$\begin{aligned} \mathbb{P}(f(\tilde{\boldsymbol{\eta}}) - \mathbb{E}f(\tilde{\boldsymbol{\eta}}) > t) &\leq \exp\left(\frac{-t^2}{2\|\Sigma^{-1} \Sigma_*^{\frac{1}{2}}\|_2^2}\right) \\ \Rightarrow \mathbb{P}\left(\sqrt{\sum_{i=1}^n \|\Sigma^{-1} \Sigma_*^{\frac{1}{2}} \tilde{\boldsymbol{\eta}}_i\|_2^2} - \mathbb{E}\sqrt{\sum_{i=1}^n \|\Sigma^{-1} \Sigma_*^{\frac{1}{2}} \tilde{\boldsymbol{\eta}}_i\|_2^2} > t\right) &\leq \exp\left(\frac{-t^2}{2\|\Sigma^{-1} \Sigma_*^{\frac{1}{2}}\|_2^2}\right) \\ \Rightarrow \mathbb{P}\left(\sqrt{\sum_{i=1}^n \|\Sigma^{-1} \boldsymbol{\eta}_i\|_2^2} - \sqrt{\mathbb{E} \sum_{i=1}^n \text{Tr}(\Sigma^{-1} \Sigma_*^{\frac{1}{2}} \tilde{\boldsymbol{\eta}}_i \tilde{\boldsymbol{\eta}}_i^T \Sigma_*^{\frac{1}{2}} \Sigma^{-1})} > t\right) &\leq \exp\left(\frac{-t^2}{2\|\Sigma^{-1} \Sigma_*^{\frac{1}{2}}\|_2^2}\right) \\ \Rightarrow \mathbb{P}\left(\sqrt{\sum_{i=1}^n \|\Sigma^{-1} \boldsymbol{\eta}_i\|_2^2} - \sqrt{n} \sqrt{\text{Tr}(\Sigma^{-1} \Sigma_* \Sigma^{-1})} > t\right) &\leq \exp\left(\frac{-t^2}{2\|\Sigma^{-1} \Sigma_*^{\frac{1}{2}}\|_2^2}\right) \end{aligned}$$

where we use Jensen's inequality in the third step for bounding the expectation  $\mathbb{E}f(\tilde{\boldsymbol{\eta}})$ . Letting  $t = \sqrt{\text{Tr}(\Sigma^{-1} \Sigma_* \Sigma^{-1})} \cdot n$  and  $\tau = \|\Sigma^{-1} \Sigma_*^{\frac{1}{2}}\|_F / \|\Sigma^{-1} \Sigma_*^{\frac{1}{2}}\|_2$ , with probability at least  $1 - \exp(-\frac{n\tau^2}{2})$ , we have

$$\sqrt{\sum_{i=1}^n \|\Sigma^{-1} \boldsymbol{\eta}_i\|_2^2} \leq 2\sqrt{n} \cdot \sqrt{\text{Tr}(\Sigma^{-1} \Sigma_* \Sigma^{-1})}, \quad (\text{S.29})$$

where we use the relation  $\text{Tr}(\Sigma^{-1} \Sigma_* \Sigma^{-1}) = \|\Sigma^{-1} \Sigma_*^{\frac{1}{2}}\|_F^2$ . By applying a union bound to (S.28) and (S.29), with probability at least  $1 - \exp(-\frac{n\tau^2}{2}) - c_3 \exp(-\frac{c_1^2 w^2(\mathcal{B})}{4\rho^2})$ , the following inequality

holds

$$\left\| \frac{1}{n} \sum_{i=1}^n \mathbf{X}_i^T \Sigma^{-1} \boldsymbol{\eta}_i \right\|_* \leq \frac{2c_0 c_1 c_2 \cdot \kappa \sqrt{\mu_{\max}}}{\sqrt{n}} \cdot \sqrt{\text{Tr}(\Sigma^{-1} \Sigma_* \Sigma^{-1})} \cdot w(\mathcal{B}) \quad (\text{S.30})$$

Finally we complete the proof by letting  $C = 2c_0 c_1 c_2$ ,  $C_1 = c_1$ , and  $C_2 = c_3$ .  $\blacksquare$

## 2.6 Proof of Theorem 1

**Statement of Theorem 1:** Under the setting of Lemma 5, if  $n \geq C_1 \kappa_0^2 \kappa^4 \cdot \frac{\mu_{\max}}{\mu_{\min}} \cdot (w(\mathcal{A}(\boldsymbol{\theta}^*)) + 3)^2$ , and  $\gamma_n$  is set to  $C_2 \kappa \sqrt{\frac{\mu_{\max} \text{Tr}(\Sigma^{-1} \Sigma_* \Sigma^{-1})}{n}} \cdot w(\mathcal{B})$ , the estimation error of  $\hat{\boldsymbol{\theta}}$  given by (11) satisfies

$$\|\hat{\boldsymbol{\theta}} - \boldsymbol{\theta}^*\|_2 \leq C \kappa \sqrt{\frac{\mu_{\max}}{\mu_{\min}^2}} \cdot \frac{\sqrt{\text{Tr}(\Sigma^{-1} \Sigma_* \Sigma^{-1})}}{\text{Tr}(\Sigma^{-1})} \cdot \frac{\Psi(\boldsymbol{\theta}^*) \cdot w(\mathcal{B})}{\sqrt{n}}, \quad (\text{S.31})$$

with probability at least  $1 - m \exp\left(-\frac{C_3 n}{\kappa^4}\right) - \exp\left(-\frac{n \tau^2}{2}\right) - C_4 \exp\left(-\frac{C_5^2 w^2(\mathcal{B})}{4 \rho^2}\right)$ .

*Proof:* By Corollary 1, we have the RE condition hold with  $\alpha = \frac{\mu_{\min}}{2} \cdot \text{Tr}(\Sigma^{-1})$  for  $\mathcal{A}(\boldsymbol{\theta}^*)$ . Combining Lemma 2 and 5, we get

$$\|\hat{\boldsymbol{\theta}} - \boldsymbol{\theta}^*\|_2 \leq 2\Psi(\boldsymbol{\theta}^*) \cdot \frac{\gamma_n}{\alpha} \leq C \kappa \sqrt{\frac{\mu_{\max}}{\mu_{\min}^2}} \cdot \frac{\sqrt{\text{Tr}(\Sigma^{-1} \Sigma_* \Sigma^{-1})}}{\text{Tr}(\Sigma^{-1})} \cdot \frac{\Psi(\boldsymbol{\theta}^*) \cdot w(\mathcal{B})}{\sqrt{n}}, \quad (\text{S.32})$$

and the probability is computed via union bound.  $\blacksquare$

## 2.7 Proof of Lemma 6

**Statement of Lemma 6:** Assume  $\mathbf{X}$  is defined as in Lemma 1 such that  $\mathbf{X} = \Xi^{\frac{1}{2}} \tilde{\mathbf{X}} \Lambda^{\frac{1}{2}}$ , and rows of  $\tilde{\mathbf{X}}$  are i.i.d. with  $\|\tilde{\mathbf{x}}_j\| \leq \tilde{\kappa}$ . If  $mn \geq C_1 \kappa_0^2 \tilde{\kappa}^4 \cdot \frac{\lambda_{\max}(\Xi) \lambda_{\max}(\Lambda)}{\lambda_{\min}(\Xi) \lambda_{\min}(\Lambda)} \cdot (w(\mathcal{A}) + 3)^2$ , with probability at least  $1 - \exp(-C_2 mn / \tilde{\kappa}^4)$ , the following inequality is satisfied by all  $\mathbf{v} \in \mathcal{A} \subseteq \mathbb{S}^{p-1}$ ,

$$\mathbf{v}^T \hat{\Gamma} \mathbf{v} \geq \frac{m}{2} \cdot \lambda_{\min}\left(\Xi^{\frac{1}{2}} \Sigma^{-1} \Xi^{\frac{1}{2}}\right) \cdot \lambda_{\min}(\Lambda). \quad (\text{S.33})$$

*Proof:* Let  $\tilde{\mathbf{x}}_i^{jT}$  denote the  $j$ -th row of  $\tilde{\mathbf{X}}_i$ , which is identically distributed as  $\tilde{\mathbf{x}}$ . In order to use Lemma C, we let  $(\Omega, \mu)$  be the probability measure that  $\tilde{\mathbf{x}}$  is defined on. Construct the set of points  $\mathcal{A}_\Lambda = \left\{ \mathbf{v} \in \mathbb{S}^{p-1} \mid \Lambda^{-\frac{1}{2}} \mathbf{v} \in \text{cone}(\mathcal{A}) \right\}$  and the function set

$$\mathcal{H} = \{h_{\mathbf{v}} = \langle \mathbf{v}, \cdot \rangle \mid \mathbf{v} \in \mathcal{A}_\Lambda\}$$

Since  $\mathcal{A}_\Lambda \subseteq \mathbb{S}^{p-1}$  and  $\tilde{\mathbf{x}}$  is isotropic, it is easy to verify that  $\mathbb{E}[h_{\mathbf{v}}^2] = \mathbb{E}_{\tilde{\mathbf{x}} \sim \mu}[\langle \tilde{\mathbf{x}}, \mathbf{v} \rangle^2] = 1$ ,  $\|h_{\mathbf{v}}\|_{\psi_2} \leq \tilde{\kappa}$  for every  $h_{\mathbf{v}} \in \mathcal{H}$ , and  $\|h_{\mathbf{v}_1} - h_{\mathbf{v}_2}\|_{\psi_2} \leq \tilde{\kappa} \|\mathbf{v}_1 - \mathbf{v}_2\|_2$  for any  $h_{\mathbf{v}_1}, h_{\mathbf{v}_2} \in \mathcal{H}$ . Further, if we let  $\beta = \frac{1}{2}$  and  $mn \geq 4c_1 c_2 \tilde{\kappa}^4 w^2(\mathcal{A}_\Lambda) \triangleq C_1 \tilde{\kappa}^4 w^2(\mathcal{A}_\Lambda)$ , using (S.7), (S.8) and (S.9), we have

$$c_1 \tilde{\kappa} \gamma_2 \left( \mathcal{H}, \|\cdot\|_{\psi_2} \right) \leq c_1 \tilde{\kappa} \gamma_2(\mathcal{A}_\Lambda, \|\cdot\|_2) \leq c_1 c_4 \tilde{\kappa}^2 w(\mathcal{A}_\Lambda) \leq \beta \sqrt{mn}$$

By Lemma C, with probability at least  $1 - \exp(-c_2 \beta^2 mn / \tilde{\kappa}^4) \triangleq 1 - \exp(-C_2 mn / \tilde{\kappa}^4)$ ,

$$\begin{aligned} \sup_{h \in \mathcal{H}_j} \left| \frac{1}{mn} \sum_{i=1}^n \sum_{j=1}^m h^2(\tilde{\mathbf{x}}_i^j) - \mathbb{E}[h^2] \right| &= \sup_{\mathbf{v} \in \mathcal{A}_\Lambda} \left| \frac{1}{mn} \sum_{i=1}^n \mathbf{v}^T \tilde{\mathbf{X}}_i^T \tilde{\mathbf{X}}_i \mathbf{v} - 1 \right| \leq \frac{1}{2} \\ &\implies \frac{1}{n} \sum_{i=1}^n \mathbf{v}^T \tilde{\mathbf{X}}_i^T \tilde{\mathbf{X}}_i \mathbf{v} \geq \frac{m}{2}, \quad \forall \mathbf{v} \in \mathcal{A}_{\Gamma_j} \\ &\implies \frac{1}{n} \sum_{i=1}^n \mathbf{v}^T \tilde{\mathbf{X}}_i^T \Xi^{\frac{1}{2}} \Sigma^{-1} \Xi^{\frac{1}{2}} \tilde{\mathbf{X}}_i \mathbf{v} \geq \frac{m}{2} \cdot \lambda_{\min}\left(\Xi^{\frac{1}{2}} \Sigma^{-1} \Xi^{\frac{1}{2}}\right), \quad \forall \mathbf{v} \in \mathcal{A}_\Lambda \\ &\implies \frac{1}{n} \sum_{i=1}^n \mathbf{v}^T \Lambda^{-\frac{1}{2}} \Lambda^{\frac{1}{2}} \tilde{\mathbf{X}}_i^T \Xi^{\frac{1}{2}} \Sigma^{-1} \Xi^{\frac{1}{2}} \tilde{\mathbf{X}}_i \Lambda^{\frac{1}{2}} \Lambda^{-\frac{1}{2}} \mathbf{v} \geq \frac{m}{2} \cdot \lambda_{\min}\left(\Xi^{\frac{1}{2}} \Sigma^{-1} \Xi^{\frac{1}{2}}\right) \mathbf{v}^T \mathbf{v}, \quad \forall \mathbf{v} \in \mathcal{A}_\Lambda \end{aligned}$$

Now we replace  $\Lambda^{-\frac{1}{2}} \mathbf{v}$  by  $\mathbf{w}$  and use the definition of  $\mathcal{A}_\Lambda$  to obtain

$$\begin{aligned} \frac{1}{n} \sum_{i=1}^n \mathbf{w}^T \Lambda^{\frac{1}{2}} \tilde{\mathbf{X}}_i^T \Xi^{\frac{1}{2}} \Sigma^{-1} \Xi^{\frac{1}{2}} \tilde{\mathbf{X}}_i \Lambda^{\frac{1}{2}} \mathbf{w} &\geq \frac{m}{2} \cdot \lambda_{\min} \left( \Xi^{\frac{1}{2}} \Sigma^{-1} \Xi^{\frac{1}{2}} \right) \cdot \mathbf{w}^T \Lambda \mathbf{w}, \quad \forall \mathbf{w} \in \text{cone}(\mathcal{A}) \\ \implies \frac{1}{n} \sum_{i=1}^n \mathbf{w}^T \mathbf{X}_i^T \Sigma^{-1} \mathbf{X}_i \mathbf{w} &\geq \frac{m}{2} \cdot \lambda_{\min} \left( \Xi^{\frac{1}{2}} \Sigma^{-1} \Xi^{\frac{1}{2}} \right) \cdot \lambda_{\min}(\Lambda), \quad \forall \mathbf{w} \in \mathcal{A} \\ \implies \mathbf{w}^T \hat{\Gamma} \mathbf{w} &\geq \frac{m}{2} \cdot \lambda_{\min} \left( \Xi^{\frac{1}{2}} \Sigma^{-1} \Xi^{\frac{1}{2}} \right) \cdot \lambda_{\min}(\Lambda), \quad \forall \mathbf{w} \in \mathcal{A} \end{aligned}$$

Finally we need to bound the Gaussian width  $w(\mathcal{A}_\Lambda)$ . Note that the proof of Lemma 1 implies that  $\|\Xi^{\frac{1}{2}} \mathbf{u}\|_2^2 \cdot \Lambda = \mathbb{E}[\mathbf{X}^T \mathbf{u} \mathbf{u}^T \mathbf{X}] = \Gamma_{\mathbf{u}}$  for any  $\mathbf{u} \in \mathbb{S}^{p-1}$ . Therefore it is not difficult to see that  $\mathcal{A}_\Lambda = \mathcal{A}_{\Gamma_{\mathbf{u}}}$ . Using Lemma 1 and 4, we have

$$w(\mathcal{A}_\Lambda) = w(\mathcal{A}_{\Gamma_{\mathbf{u}}}) \leq C\kappa_0 \sqrt{\frac{\mu_{\max}}{\mu_{\min}}} \cdot (w(\mathcal{A}) + 3) = C\kappa_0 \sqrt{\frac{\lambda_{\max}(\Xi) \lambda_{\max}(\Lambda)}{\lambda_{\min}(\Xi) \lambda_{\min}(\Lambda)}} \cdot (w(\mathcal{A}) + 3),$$

which completes the proof.  $\blacksquare$

## 2.8 Proof of Corollary 2

**Statement of Corollary 2:** Suppose  $\mathbf{y} = \mathbf{X}\boldsymbol{\theta}^* + \boldsymbol{\eta} \in \mathbb{R}^m$ , where  $\mathbf{X}$  is described in Lemma 6, and  $\boldsymbol{\eta} \sim \mathcal{N}(\mathbf{0}, \mathbf{I})$ . With probability at least  $1 - \exp(-\frac{m}{2}) - C_2 \exp(-\frac{C_1^2 w^2(\mathcal{B})}{4\rho^2}) - \exp(-C_3 m/\tilde{\kappa}^4)$ ,  $\hat{\boldsymbol{\theta}}_{\text{sg}}$  satisfies

$$\|\hat{\boldsymbol{\theta}}_{\text{sg}} - \boldsymbol{\theta}^*\|_2 \leq C\tilde{\kappa} \cdot \sqrt{\frac{\lambda_{\max}(\Xi) \lambda_{\max}(\Lambda)}{\lambda_{\min}^2(\Xi) \lambda_{\min}^2(\Lambda)}} \cdot \frac{\Psi(\boldsymbol{\theta}^*) \cdot w(\mathcal{B})}{\sqrt{m}}, \quad (\text{S.34})$$

*Proof:* Setting  $n = 1$  and  $\Sigma = \Sigma_* = \mathbf{I}$  for Lemma 5, we have

$$\|\mathbf{X}^T \Sigma^{-1} \boldsymbol{\eta}\|_* = \|\mathbf{X}^T \boldsymbol{\eta}\|_* \leq c\tilde{\kappa} \sqrt{m \cdot \mu_{\max}} \cdot w(\mathcal{B}) = c\tilde{\kappa} \sqrt{m \cdot \lambda_{\max}(\Xi) \lambda_{\max}(\Lambda)} \cdot w(\mathcal{B}),$$

with probability  $1 - \exp(-\frac{m}{2}) - C_2 \exp(-\frac{C_1^2 w^2(\mathcal{B})}{4\rho^2})$ . By Lemma 6, we have  $\alpha = \frac{m \cdot \lambda_{\min}(\Xi) \lambda_{\min}(\Lambda)}{2}$ , with probability at least  $1 - \exp(-C_3 m/\tilde{\kappa}^4)$ . Therefore, it follows from Lemma 2 that

$$\|\hat{\boldsymbol{\theta}}_{\text{sg}} - \boldsymbol{\theta}^*\|_2 \leq 2\Psi(\boldsymbol{\theta}^*) \cdot \frac{\gamma}{\alpha} \leq C\tilde{\kappa} \cdot \sqrt{\frac{\lambda_{\max}(\Xi) \lambda_{\max}(\Lambda)}{\lambda_{\min}^2(\Xi) \lambda_{\min}^2(\Lambda)}} \cdot \frac{\Psi(\boldsymbol{\theta}^*) \cdot w(\mathcal{B})}{\sqrt{m}}$$

which completes the proof.  $\blacksquare$

## 3 Proofs for Section 3.2

### 3.1 Proof of Theorem 2

**Statement of Theorem 2:**

If  $n \geq C^4 m \cdot \max \left\{ 4 \left( \kappa_0 + \kappa \sqrt{\frac{\mu_{\max}}{\lambda_{\min}(\Sigma_*)}} \|\boldsymbol{\theta}^* - \boldsymbol{\theta}\|_2 \right)^4, \kappa^4 \left( \frac{\lambda_{\max}(\Sigma_*) \mu_{\max}}{\lambda_{\min}(\Sigma_*) \mu_{\min}} \right)^2 \right\}$  and  $\mathbf{X}_i$  is sub-Gaussian, with probability at least  $1 - 2 \exp(-C_1 m)$ ,  $\hat{\Sigma}$  given by (22) satisfies

$$\lambda_{\max} \left( \Sigma_*^{-\frac{1}{2}} \hat{\Sigma} \Sigma_*^{-\frac{1}{2}} \right) \leq 1 + C^2 \kappa_0^2 \sqrt{m/n} + \frac{2\mu_{\max}}{\lambda_{\min}(\Sigma_*)} \|\boldsymbol{\theta}^* - \boldsymbol{\theta}\|_2^2 \quad (\text{S.35})$$

$$\lambda_{\min} \left( \Sigma_*^{-\frac{1}{2}} \hat{\Sigma} \Sigma_*^{-\frac{1}{2}} \right) \geq 1 - C^2 \kappa_0^2 \sqrt{m/n} \quad (\text{S.36})$$

*Proof:* By introducing the true parameter  $\boldsymbol{\theta}^*$ ,  $\hat{\Sigma}$  can be rewritten as

$$\hat{\Sigma} = \frac{1}{n} \sum_{i=1}^n (\boldsymbol{\eta}_i + \mathbf{X}_i(\boldsymbol{\theta}^* - \boldsymbol{\theta})) (\boldsymbol{\eta}_i + \mathbf{X}_i(\boldsymbol{\theta}^* - \boldsymbol{\theta}))^T$$

And note that

$$\Sigma_{\theta} \triangleq \mathbb{E}[\hat{\Sigma}] = \Sigma_* + \Delta_{\theta}, \text{ where } \Delta_{\theta} = \mathbb{E}[\mathbf{X}(\theta^* - \theta)(\theta^* - \theta)^T \mathbf{X}^T].$$

The  $\psi_2$ -norm of  $\Sigma_*^{-\frac{1}{2}}(\eta + \mathbf{X}(\theta^* - \theta))$  satisfies

$$\begin{aligned} \left\| \Sigma_*^{-\frac{1}{2}}(\eta + \mathbf{X}(\theta^* - \theta)) \right\|_{\psi_2} &\leq \left\| \Sigma_*^{-\frac{1}{2}}\eta \right\|_{\psi_2} + \left\| \Sigma_*^{-\frac{1}{2}}\mathbf{X}(\theta^* - \theta) \right\|_{\psi_2} \\ &= \left\| \tilde{\eta} \right\|_{\psi_2} + \sup_{\mathbf{u} \in \mathbb{S}^{m-1}} \left\| (\theta^* - \theta)^T \Gamma_{*\mathbf{u}}^{\frac{1}{2}} \Gamma_{*\mathbf{u}}^{-\frac{1}{2}} \mathbf{X}^T \Sigma_*^{-\frac{1}{2}} \mathbf{u} \right\|_{\psi_2} \\ &\leq \kappa_0 + \sup_{\substack{\mathbf{v} \in \mathbb{S}^{p-1} \\ \mathbf{u} \in \mathbb{S}^{m-1}}} \left\| \Gamma_{*\mathbf{u}}^{\frac{1}{2}}(\theta^* - \theta) \right\|_2 \cdot \left\| \mathbf{v}^T \Gamma_{*\mathbf{u}}^{-\frac{1}{2}} \mathbf{X}^T \Sigma_*^{-\frac{1}{2}} \mathbf{u} \right\|_{\psi_2} \\ &\leq \kappa_0 + \kappa \sup_{\mathbf{u} \in \mathbb{S}^{m-1}} \left\| \Gamma_{*\mathbf{u}}^{\frac{1}{2}} \right\|_2 \|\theta^* - \theta\|_2 \\ &\leq \kappa_0 + \kappa \sqrt{\frac{\mu_{\max}}{\lambda_{\min}(\Sigma_*)}} \|\theta^* - \theta\|_2 \end{aligned}$$

where  $\Gamma_{*\mathbf{u}} = \mathbb{E}[\mathbf{X}^T \Sigma_*^{-\frac{1}{2}} \mathbf{u} \mathbf{u}^T \Sigma_*^{-\frac{1}{2}} \mathbf{X}]$ , and  $\|\Gamma_{*\mathbf{u}}\|_2^2 \leq \mu_{\max} \|\Sigma_*^{-\frac{1}{2}} \mathbf{u}\|_2^2 \leq \frac{\mu_{\max}}{\lambda_{\min}(\Sigma_*)}$  by the definition of sub-Gaussian  $\mathbf{X}$ .  $\kappa_0$  is the  $\psi_2$ -norm of standard Gaussian random vector. By Theorem 5.39 and Remark 5.40 in [6], if  $n \geq C_0^4 m \left( \kappa_0 + \kappa \sqrt{\frac{\mu_{\max}}{\lambda_{\min}(\Sigma_*)}} \|\theta^* - \theta\|_2 \right)^4$ , with probability at least  $1 - 2\exp(-C_1 m)$ , we have

$$\left\| \Sigma_*^{-\frac{1}{2}}(\hat{\Sigma} - \Sigma_{\theta}) \Sigma_*^{-\frac{1}{2}} \right\|_2 \leq C_0^2 \left( \kappa_0 + \kappa \sqrt{\frac{\mu_{\max}}{\lambda_{\min}(\Sigma_*)}} \|\theta^* - \theta\|_2 \right)^2 \sqrt{\frac{m}{n}} \quad (\text{S.37})$$

Hence we have

$$\begin{aligned} \lambda_{\max}(\Sigma_*^{-\frac{1}{2}} \hat{\Sigma} \Sigma_*^{-\frac{1}{2}}) &= \left\| \Sigma_*^{-\frac{1}{2}} \hat{\Sigma} \Sigma_*^{-\frac{1}{2}} \right\|_2 \leq 1 + \left\| \Sigma_*^{-\frac{1}{2}}(\hat{\Sigma} - \Sigma_{\theta}) \Sigma_*^{-\frac{1}{2}} \right\|_2 + \left\| \Sigma_*^{-\frac{1}{2}} \Delta_{\theta} \Sigma_*^{-\frac{1}{2}} \right\|_2 \\ &\leq 1 + C_0^2 \left( \kappa_0 + \kappa \sqrt{\frac{\mu_{\max}}{\lambda_{\min}(\Sigma_*)}} \|\theta^* - \theta\|_2 \right)^2 \sqrt{\frac{m}{n}} + \frac{\mu_{\max}}{\lambda_{\min}(\Sigma_*)} \|\theta^* - \theta\|_2^2 \\ &\stackrel{(a)}{\leq} 1 + 2C_0^2 \kappa_0^2 \sqrt{\frac{m}{n}} + \frac{2C_0^2 \kappa^2 \mu_{\max}}{\lambda_{\min}(\Sigma_*)} \|\theta^* - \theta\|_2^2 \sqrt{\frac{m}{n}} + \frac{\mu_{\max}}{\lambda_{\min}(\Sigma_*)} \|\theta^* - \theta\|_2^2 \\ &\leq 1 + 2C_0^2 \kappa_0^2 \sqrt{\frac{m}{n}} + \left( \frac{\mu_{\min}}{\lambda_{\max}(\Sigma_*)} + \frac{\mu_{\max}}{\lambda_{\min}(\Sigma_*)} \right) \|\theta^* - \theta\|_2^2 \\ &\leq 1 + C^2 \kappa_0^2 \sqrt{\frac{m}{n}} + \frac{2\mu_{\max}}{\lambda_{\min}(\Sigma_*)} \|\theta^* - \theta\|_2^2 \end{aligned} \quad (\text{S.38})$$

$$\begin{aligned} \lambda_{\min}(\Sigma_*^{-\frac{1}{2}} \hat{\Sigma} \Sigma_*^{-\frac{1}{2}}) &\geq 1 + \lambda_{\min}(\Sigma_*^{-\frac{1}{2}}(\hat{\Sigma} - \Sigma_{\theta}) \Sigma_*^{-\frac{1}{2}}) + \lambda_{\min}(\Sigma_*^{-\frac{1}{2}} \Delta_{\theta} \Sigma_*^{-\frac{1}{2}}) \\ &\geq 1 - \left\| \Sigma_*^{-\frac{1}{2}}(\hat{\Sigma} - \Sigma_{\theta}) \Sigma_*^{-\frac{1}{2}} \right\|_2 + \frac{\mu_{\min}}{\lambda_{\max}(\Sigma_*)} \|\theta^* - \theta\|_2^2 \\ &\geq 1 - C_0^2 \left( \kappa_0 + \kappa \sqrt{\frac{\mu_{\max}}{\lambda_{\min}(\Sigma_*)}} \|\theta^* - \theta\|_2 \right)^2 \sqrt{\frac{m}{n}} + \frac{\mu_{\min}}{\lambda_{\max}(\Sigma_*)} \|\theta^* - \theta\|_2^2 \\ &\stackrel{(b)}{\geq} 1 - 2C_0^2 \kappa_0^2 \sqrt{\frac{m}{n}} - \frac{2C_0^2 \kappa^2 \mu_{\max}}{\lambda_{\min}(\Sigma_*)} \|\theta^* - \theta\|_2^2 \sqrt{\frac{m}{n}} + \frac{\mu_{\min}}{\lambda_{\max}(\Sigma_*)} \|\theta^* - \theta\|_2^2 \\ &\geq 1 - C^2 \kappa_0^2 \sqrt{\frac{m}{n}} \end{aligned} \quad (\text{S.39})$$

where  $C^2 = 2C_0^2$ , and in both (a) and (b), we use the assumption  $n \geq C^4 m \kappa^4 \left( \frac{\lambda_{\max}(\Sigma_*) \mu_{\max}}{\lambda_{\min}(\Sigma_*) \mu_{\min}} \right)^2 = 4C_0^4 m \kappa^4 \left( \frac{\lambda_{\max}(\Sigma_*) \mu_{\max}}{\lambda_{\min}(\Sigma_*) \mu_{\min}} \right)^2$ . This completes the proof.  $\blacksquare$

## 4 Proofs for Section 3.3

### 4.1 Proof of Lemma 7

**Statement of Lemma 7:** *If  $\hat{\Sigma}$  is given as (22) and the condition in Theorem 2 holds, then the inequality below holds with probability at least  $1 - 2 \exp(-C_1 m)$ ,*

$$\xi(\hat{\Sigma}) \leq \xi(\Sigma_*) \cdot \left( 1 + 2C\kappa_0 \left( \frac{m}{n} \right)^{\frac{1}{4}} + 2\sqrt{\frac{\mu_{\max}}{\lambda_{\min}(\Sigma_*)}} \|\theta^* - \theta\|_2 \right) \quad (\text{S.40})$$

*Proof:* Based on the definition of  $\xi(\cdot)$ , we have

$$\begin{aligned} \xi(\hat{\Sigma}) &= \frac{\sqrt{\text{Tr}(\hat{\Sigma}^{-1} \Sigma_* \hat{\Sigma}^{-1})}}{\text{Tr}(\hat{\Sigma}^{-1})} = \frac{1}{\sqrt{\text{Tr}(\Sigma_*^{-1})}} \cdot \sqrt{\frac{\text{Tr}(\Sigma_*^{-1}) \cdot \text{Tr}(\hat{\Sigma}^{-1} \Sigma_* \hat{\Sigma}^{-1})}{\text{Tr}^2(\hat{\Sigma}^{-1})}} \\ &= \xi(\Sigma_*) \cdot \sqrt{\frac{\text{Tr}(\hat{\Sigma}^{\frac{1}{2}} \Sigma_*^{-1} \hat{\Sigma}^{\frac{1}{2}} \hat{\Sigma}^{-1}) \cdot \text{Tr}(\hat{\Sigma}^{-\frac{1}{2}} \Sigma_* \hat{\Sigma}^{-\frac{1}{2}} \hat{\Sigma}^{-1})}{\text{Tr}^2(\hat{\Sigma}^{-1})}} \\ &\leq \xi(\Sigma_*) \cdot \sqrt{\frac{\lambda_{\max}(\hat{\Sigma}^{\frac{1}{2}} \Sigma_*^{-1} \hat{\Sigma}^{\frac{1}{2}}) \text{Tr}(\hat{\Sigma}^{-1}) \cdot \lambda_{\max}(\hat{\Sigma}^{-\frac{1}{2}} \Sigma_* \hat{\Sigma}^{-\frac{1}{2}}) \text{Tr}(\hat{\Sigma}^{-1})}{\text{Tr}^2(\hat{\Sigma}^{-1})}} \\ &= \xi(\Sigma_*) \cdot \sqrt{\lambda_{\max}(\hat{\Sigma}^{\frac{1}{2}} \Sigma_*^{-1} \hat{\Sigma}^{\frac{1}{2}}) \lambda_{\max}(\hat{\Sigma}^{-\frac{1}{2}} \Sigma_* \hat{\Sigma}^{-\frac{1}{2}})} = \xi(\Sigma_*) \cdot \sqrt{\frac{\lambda_{\max}(\Sigma_*^{-\frac{1}{2}} \hat{\Sigma} \Sigma_*^{-\frac{1}{2}})}{\lambda_{\min}(\Sigma_*^{-\frac{1}{2}} \hat{\Sigma} \Sigma_*^{-\frac{1}{2}})}} \quad (\text{S.41}) \end{aligned}$$

where the inequality follows from von Neumann's trace inequality. Now we can bound  $\xi(\hat{\Sigma})$  by invoking Theorem 2,

$$\begin{aligned} \xi(\hat{\Sigma}) &\leq \xi(\Sigma_*) \cdot \sqrt{\frac{1 + C^2 \kappa_0^2 \sqrt{\frac{m}{n}} + \frac{2\mu_{\max}}{\lambda_{\min}(\Sigma_*)} \|\theta^* - \theta\|_2^2}{1 - C^2 \kappa_0^2 \sqrt{\frac{m}{n}}}} \\ &= \xi(\Sigma_*) \cdot \sqrt{1 + \frac{2C^2 \kappa_0^2 \sqrt{\frac{m}{n}} + \frac{2\mu_{\max}}{\lambda_{\min}(\Sigma_*)} \|\theta^* - \theta\|_2^2}{1 - C^2 \kappa_0^2 \sqrt{\frac{m}{n}}}} \quad (\text{S.42}) \\ &\leq \xi(\Sigma_*) \cdot \left( 1 + \frac{\sqrt{2} C \kappa_0 \left( \frac{m}{n} \right)^{\frac{1}{4}} + \sqrt{\frac{2\mu_{\max}}{\lambda_{\min}(\Sigma_*)}} \|\theta^* - \theta\|_2}{\sqrt{1 - C^2 \kappa_0^2 \sqrt{\frac{m}{n}}}} \right) \\ &\leq \xi(\Sigma_*) \cdot \left( 1 + 2C\kappa_0 \left( \frac{m}{n} \right)^{\frac{1}{4}} + 2\sqrt{\frac{\mu_{\max}}{\lambda_{\min}(\Sigma_*)}} \|\theta^* - \theta\|_2 \right) \end{aligned}$$

where the last inequality follows from  $n \geq 4C^4 m \cdot \left( \kappa_0 + \kappa \sqrt{\frac{\mu_{\max}}{\lambda_{\min}(\Sigma_*)}} \|\theta^* - \theta\|_2 \right)^4 \geq 4C^4 m \kappa_0^4$ .  $\blacksquare$

### 4.2 Proof of Theorem 3

**Statement of Theorem 3:**

Let  $e_{\text{orc}} = C_1 \kappa \sqrt{\frac{\mu_{\max}}{\mu_{\min}^2} \frac{\xi(\Sigma_*) \cdot \Psi(\theta^*) w(\mathcal{B})}{\sqrt{n}}}$  and  $e_{\text{min}} = e_{\text{orc}} \cdot \frac{1 + 2C\kappa_0 \left( \frac{m}{n} \right)^{\frac{1}{4}}}{1 - 2e_{\text{orc}} \sqrt{\frac{\mu_{\max}}{\lambda_{\min}(\Sigma_*)}}}$ . If  $n \geq C^4 m \cdot \max \left\{ 4 \left( \kappa_0 + \frac{C_1}{C^2} \sqrt{\frac{\lambda_{\min}(\Sigma_*)}{\lambda_{\max}^2(\Sigma_*)}} \frac{\Psi(\theta^*) w(\mathcal{B})}{m} \right)^4, \kappa^4 \left( \frac{\lambda_{\max}(\Sigma_*) \mu_{\max}}{\lambda_{\min}(\Sigma_*) \mu_{\min}} \right)^2, \left( \frac{2C_1 \kappa \mu_{\max}}{C^2 \mu_{\min}} \cdot \frac{\xi(\Sigma_*) \Psi(\theta^*) w(\mathcal{B})}{\sqrt{m \cdot \lambda_{\min}(\Sigma_*)}} \right)^2 \right\}$

and also satisfies the condition in Theorem 1, with high probability, the iterate  $\hat{\theta}_T$  returned by Algorithm 1 satisfies

$$\|\hat{\theta}_T - \theta^*\|_2 \leq e_{\min} + \left(2e_{\text{orc}} \sqrt{\frac{\mu_{\max}}{\lambda_{\min}(\Sigma_*)}}\right)^{T-1} \cdot (\|\hat{\theta}_1 - \theta^*\|_2 - e_{\min}) \quad (\text{S.43})$$

*Proof:* Since  $n \geq C^4 m \kappa^4 \left(\frac{\lambda_{\max}(\Sigma_*) \mu_{\max}}{\lambda_{\min}(\Sigma_*) \mu_{\min}}\right)^2$  and  $\hat{\Sigma}_0$  is initialized as  $\hat{\Sigma}_0 = \mathbf{I}_{m \times m}$ , by applying Theorem 1 to  $\hat{\theta}_1$ , we have

$$\begin{aligned} \|\hat{\theta}_1 - \theta^*\|_2 &\leq C_1 \kappa \sqrt{\frac{\mu_{\max}}{\mu_{\min}^2}} \cdot \xi(\hat{\Sigma}_0) \cdot \frac{\Psi(\theta^*) \cdot w(\mathcal{B})}{\sqrt{m}} = C_1 \kappa \sqrt{\frac{\mu_{\max}}{\mu_{\min}^2}} \cdot \frac{\Psi(\theta^*) \cdot w(\mathcal{B})}{\sqrt{mn}} \\ &\leq C_1 \kappa \sqrt{\frac{\mu_{\max}}{\mu_{\min}^2}} \cdot \frac{\Psi(\theta^*) \cdot w(\mathcal{B})}{\sqrt{m}} \cdot \frac{\lambda_{\min}(\Sigma_*) \mu_{\min}}{C^2 \sqrt{m} \cdot \kappa^2 \lambda_{\max}(\Sigma_*) \mu_{\max}} \\ &= \frac{C_1}{C^2} \cdot \frac{\lambda_{\min}(\Sigma_*)}{\kappa \lambda_{\max}(\Sigma_*) \sqrt{\mu_{\max}}} \cdot \frac{\Psi(\theta^*) \cdot w(\mathcal{B})}{m} \end{aligned}$$

It follows that

$$\begin{aligned} n &\geq C^4 m \cdot 4 \left( \kappa_0 + \frac{C_1}{C^2} \sqrt{\frac{\lambda_{\min}(\Sigma_*) \Psi(\theta^*) w(\mathcal{B})}{\lambda_{\max}^2(\Sigma_*) m}} \right)^4 \Rightarrow \\ n &\geq C^4 m \cdot 4 \left( \kappa_0 + \kappa \sqrt{\frac{\mu_{\max}}{\lambda_{\min}(\Sigma_*)}} \|\theta^* - \hat{\theta}_1\|_2 \right)^4 \end{aligned}$$

By applying Lemma 7 and Theorem 1 to the second iteration,

$$\begin{aligned} \|\hat{\theta}_2 - \theta^*\|_2 &\leq e_{\text{orc}} \cdot \left(1 + 2C\kappa_0 \left(\frac{m}{n}\right)^{\frac{1}{4}} + 2\sqrt{\frac{\mu_{\max}}{\lambda_{\min}(\Sigma_*)}} \|\hat{\theta}_1 - \theta^*\|_2\right) \Rightarrow \\ \|\hat{\theta}_2 - \theta^*\|_2 - e_{\min} &\leq 2e_{\text{orc}} \sqrt{\frac{\mu_{\max}}{\lambda_{\min}(\Sigma_*)}} \cdot (\|\hat{\theta}_1 - \theta^*\|_2 - e_{\min}). \end{aligned}$$

Since  $n \geq C^4 m \cdot \left(\frac{2C_1 \kappa}{C^2} \cdot \frac{\mu_{\max}}{\mu_{\min}} \cdot \frac{\xi(\Sigma_*) \Psi(\theta^*) w(\mathcal{B})}{\sqrt{m \cdot \lambda_{\min}(\Sigma_*)}}\right)^2$ , we have  $2e_{\text{orc}} \sqrt{\frac{\mu_{\max}}{\lambda_{\min}(\Sigma_*)}} \leq 1$ , which indicates that  $\|\hat{\theta}_2 - \theta^*\|_2 \leq \|\hat{\theta}_1 - \theta^*\|_2$ . Therefore the condition in Lemma 7 on sample size  $n$  also holds for  $\hat{\theta}_2$  and so on. By repeatedly applying Lemma 7 and Theorem 1, we have the following inequality for every  $t > 0$ ,

$$\|\hat{\theta}_{t+1} - \theta^*\|_2 - e_{\min} \leq 2e_{\text{orc}} \sqrt{\frac{\mu_{\max}}{\lambda_{\min}(\Sigma_*)}} \cdot (\|\hat{\theta}_t - \theta^*\|_2 - e_{\min}) \quad (\text{S.44})$$

By combining (S.44) for every  $t$ , we obtain

$$\|\hat{\theta}_T - \theta^*\|_2 - e_{\min} \leq \left(2e_{\text{orc}} \sqrt{\frac{\mu_{\max}}{\lambda_{\min}(\Sigma_*)}}\right)^{T-1} \cdot (\|\hat{\theta}_1 - \theta^*\|_2 - e_{\min})$$

which completes the proof.  $\blacksquare$

## References

- [1] A. Maurer, M. Pontil, and B. Romera-Paredes. An Inequality with Applications to Structured Sparsity and Multitask Dictionary Learning. In *Conference on Learning Theory (COLT)*, 2014.
- [2] S. Mendelson, A. Pajor, and N. Tomczak-Jaegermann. Reconstruction and subGaussian operators in asymptotic geometric analysis. *Geometric and Functional Analysis*, 17:1248–1282, 2007.
- [3] M. Talagrand. A simple proof of the majorizing measure theorem. *Geometric & Functional Analysis GAFA*, 2(1):118–125, 1992.

- [4] M. Talagrand. *The Generic Chaining*. Springer, 2005.
- [5] M. Talagrand. *Upper and Lower Bounds for Stochastic Processes*. Springer, 2014.
- [6] R. Vershynin. Introduction to the non-asymptotic analysis of random matrices. In Y. Eldar and G. Kutyniok, editors, *Compressed Sensing*, chapter 5, pages 210–268. Cambridge University Press, 2012.
